# Supplementary material for: Estrogen-sensitive medial preoptic area neurons coordinate torpor in mice
Source: PubMed Central journal article supplement (PMC7732979; doi:10.1038/s41467-020-20050-1), 2020-12-11
Supplement: 41467_2020_20050_MOESM1_ESM.pdf [file 41467_2020_20050_MOESM1_ESM.pdf]

## Supplementary Information

### Estrogen-Sensitive Medial Preoptic Area Neurons Coordinate Torpor in Mice

Zhi Zhang<sup>1,2</sup>, Fernando M. C. V. Reis<sup>3</sup>, Yanlin He<sup>4,5</sup>, Jae W. Park<sup>1</sup>, Johnathon R. DiVittorio<sup>1</sup>, Nilla Sivakumar<sup>1</sup>, J. Edward van Veen<sup>1,2</sup>, Sandra Maesta-Pereira<sup>3</sup>, Michael Shum<sup>6,7</sup>, India Nichols<sup>1</sup>, Megan G. Massa<sup>1,2</sup>, Shawn Anderson<sup>1</sup>, Ketema Paul<sup>1</sup>, Marc Liesa<sup>6,7</sup>, Olujimi A. Ajijola<sup>8</sup>, Yong Xu<sup>4</sup>, Avishek Adhikari<sup>2,3</sup>, Stephanie M. Correa<sup>1,2\*</sup>

#### Affiliations

<sup>1</sup> Department of Integrative Biology and Physiology, University of California Los Angeles, CA, USA

<sup>2</sup> Brain Research Institute, University of California Los Angeles, CA, USA

<sup>3</sup> Department of Psychology, University of California Los Angeles, CA, USA

<sup>4</sup> USDA/ARS Children's Nutrition Research Center, Department of Pediatrics, Baylor College of Medicine, Houston, TX, USA

<sup>5</sup> Pennington Biomedical Research Center, Louisiana State University, Baton Rouge, LA, USA.

<sup>6</sup> Division of Endocrinology, Department of Medicine, David Geffen School of Medicine, Los Angeles, CA, USA

<sup>7</sup> Department of Molecular and Medical Pharmacology, David Geffen School of Medicine, Los Angeles, CA, USA

<sup>8</sup> UCLA Cardiac Arrhythmia Center, Department of Medicine, David Geffen School of Medicine, Los Angeles, CA, USA

\*author for correspondence: [stephaniecorrea@ucla.edu](mailto:stephaniecorrea@ucla.edu)

#### **Supplementary Information provided in this file:**

Supplementary Figure 1. Activating ER $\alpha$ + MPA neurons alters temperature and heat loss

Supplementary Figure 2. Chemogenetic activation of ER $\alpha$ + MPA neurons induces a torpor-like state

Supplementary Figure 3. Neuronal activity of ER $\alpha$ + MPA neurons during temperature challenge

Supplementary Figure 4. Sex differences after ablating ER $\alpha$ + MPA cells in baseline activity and fasting-induced torpor

Supplementary Figure 5. Projections of ER $\alpha$ + neurons from the MPA

Supplementary Table 1. qPCR primer sequences

#### **Supplementary Files available separately:**

Source\_Data.xlsx

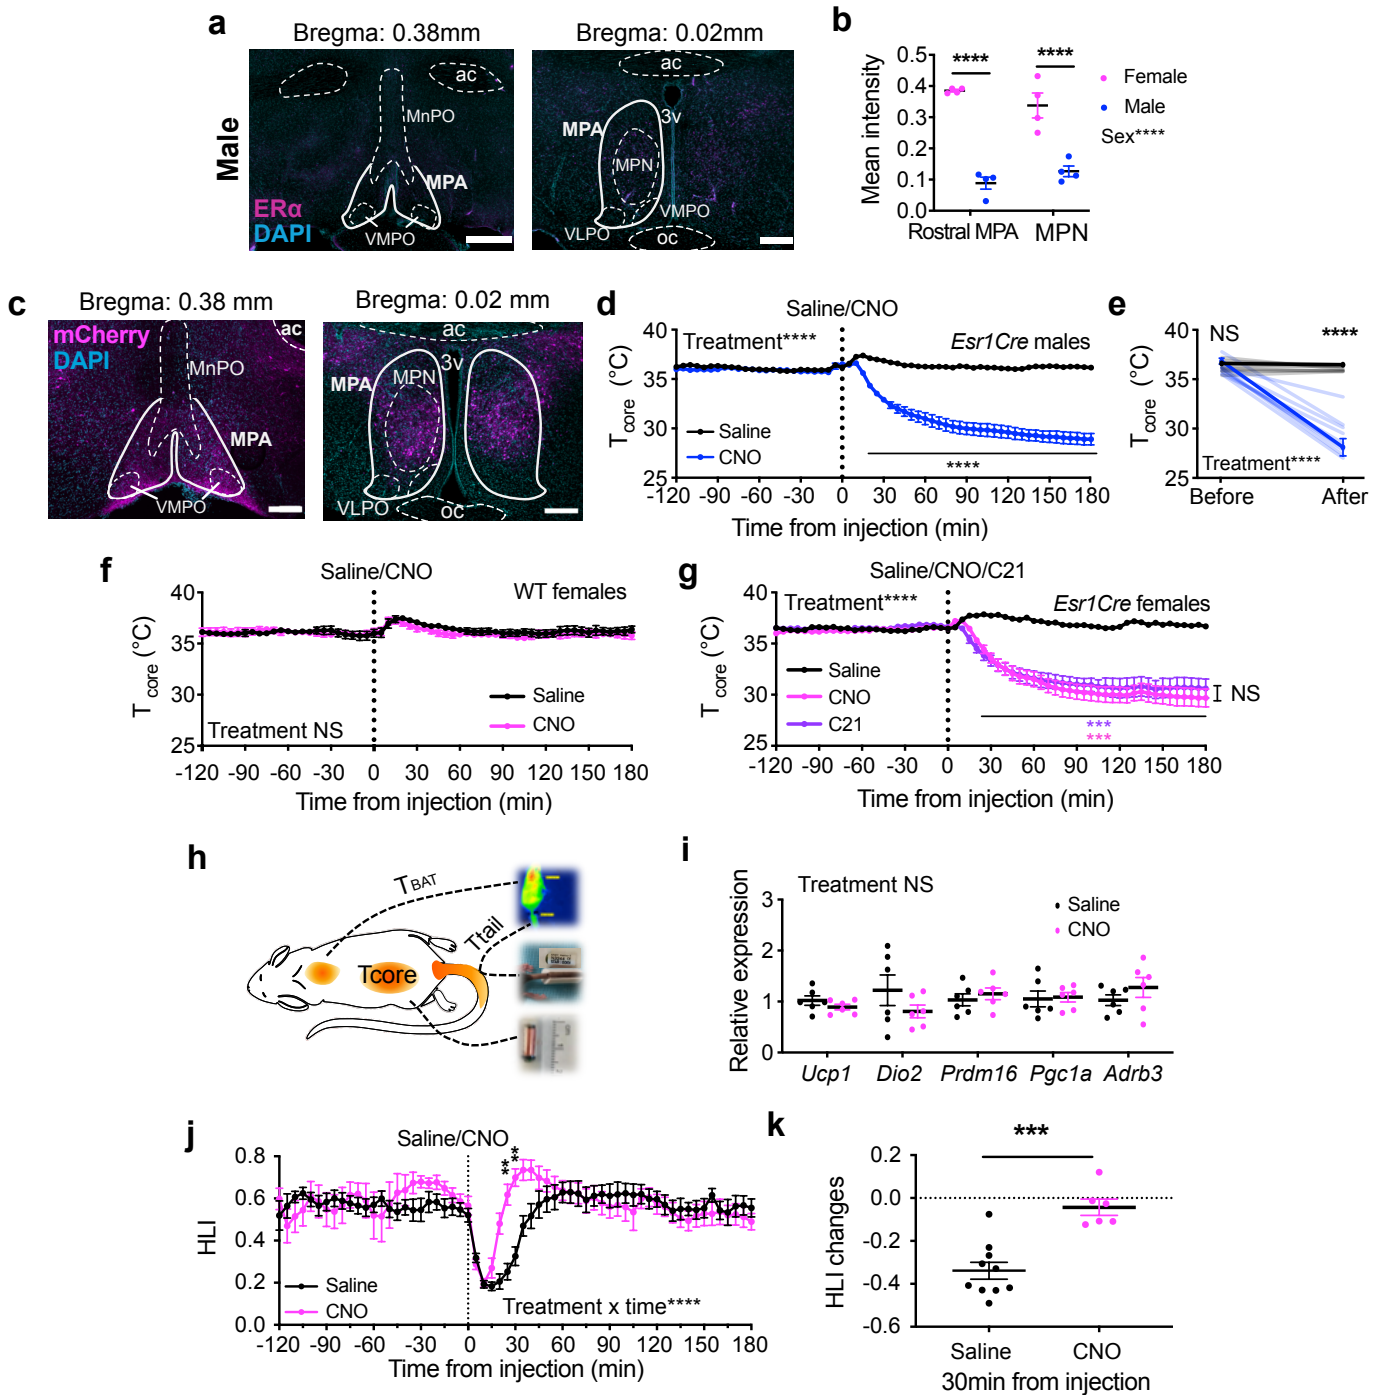

**Supplementary Figure 1. Activating ER $\alpha$ + MPA neurons alters temperature and heat loss.** **a**, ER $\alpha$  immunoreactivity (magenta) in the MPA of adult male mice. Image representative of  $n = 4$  mice. Scale bar: 200  $\mu\text{m}$ . 3v, third ventricle; ac, anterior commissure; MnPO, median preoptic nucleus; MPA, medial preoptic area; MPN, medial preoptic nucleus; oc, optic chiasm; VLPO, ventrolateral preoptic nucleus; VMPO, ventromedial preoptic nucleus. **b**, Quantification of mean ER $\alpha$  intensity in rostral MPA and MPN; **c**, mCherry reporter expression in the MPA of *Esr1Cre* males following stereotaxic delivery of AAV-flex-hM3Dq-mCherry to the MPA. Images representative of  $n=9$  mice. Scale bar: 200  $\mu\text{m}$ . **d**, Core body temperature measured every 5 minutes before and after injection (dotted line at  $x=0$ ) of saline (black) or CNO (blue) in  $n=9$  *Esr1Cre* male mice. **e**, Per-animal averages of core temperature before (-120 min to 0 min) and after (120 min to 180 min) saline or CNO injection for animals shown in **d**. **f**, Core body temperature before and after injection of saline (black) or CNO (pink) in wide-type females ( $n=6$ ). **g**, Core body temperature before and after injection of saline (black), CNO (pink) or C21

(purple) in *Esr1Cre* females (n=6). **h**, Schematic showing the strategy of measuring core ( $T_{\text{core}}$ ), brown adipose tissue ( $T_{\text{BAT}}$ ) and tail ( $T_{\text{tail}}$ ) temperature. **i**, qPCR analysis of thermogenic gene expression in BAT 90 min after saline or CNO injection in *Esr1Cre* females expressing hM3Dq in the MPA (n=6 per group). **j**, heat loss index (HLI) calculated by attached tail thermo-logger before and after injection (dotted line at x = 0) of saline (black, n=10 mice) or CNO (pink, n=6 mice) in *Esr1Cre* females expressing hM3Dq in the MPA. **k**, Changes in HLI from baseline (-120 min to 0 min) to after (25 min to 35 min) saline or CNO injection. Statistical significance denoted by NS, not significant; \*\*, p<0.05; \*\*\*, p<0.01; \*\*\*\*, p<0.0001 for Sidak's multiple comparison tests following a significant effect of treatment or the interaction of treatment with region (**b**) time (**d-g**, **i**) or gene (**h**) in a two-way ANOVA (**b**, **i**) or RM ANOVA (**d-g**, **j**). \*\*\*\*, p<0.001 for (**k**) paired, two-tailed student's t-test. All error bars show SEM.

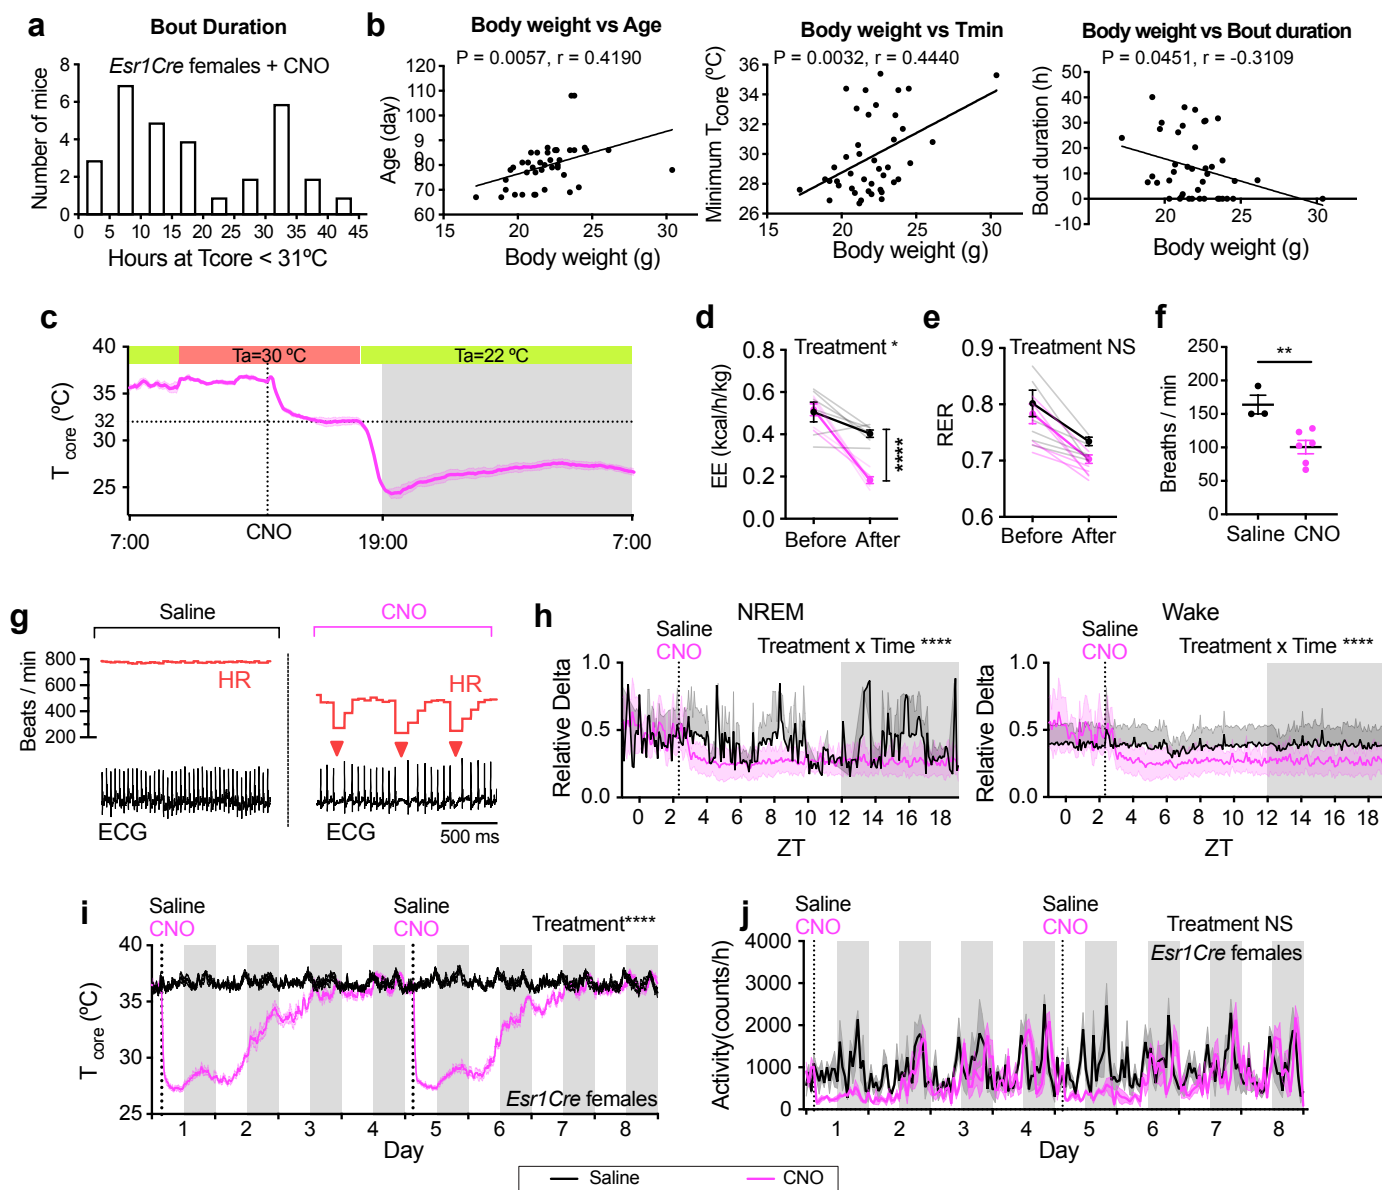

**Supplementary Figure 2. Chemogenetic activation of ER $\alpha$ + MPA neurons induces a torpor-like state.** **a**, Frequency distribution showing duration of hypothermia bouts ( $T_{\text{core}} < 31^{\circ}\text{C}$ ) after CNO injection ( $n=31$  mice). **b**, Linear regressions for body weight vs. age, body weight vs. minimum core temperature ( $T_{\text{min}}$ ), and BW vs. bout duration after CNO injection ( $n=42$  female *Esr1Cre* mice). **c**, Core temperature after CNO injection in mice ( $n=4$  *Esr1Cre* females) during exposure to an ambient temperature ( $T_{\text{a}}$ ) of  $30^{\circ}\text{C}$  (red bar) then  $22^{\circ}\text{C}$  (green bar). **d**, **e**, Energy expenditure (EE or heat generation kcal/h/kg) (**d**) and respiratory exchange ratio (RER) (**e**) before (-40 min to 0) and after (120 min to 180 min) saline or CNO injection calculated from indirect calorimetry data and normalized to lean body mass ( $n = 6$  *Esr1Cre* females). **f**, Respiratory rate (breaths/min) quantified from >1 min videos of *Esr1Cre* mice 3 hours after saline ( $n = 3$  females) or CNO ( $n = 5$  females, 1 male) injection. **g**, Representative ECG in mice 4 h after saline or CNO injection. Red arrowheads indicate skipped heart beats. **h**, Relative delta power from 4-day consecutive EEG recordings with saline NREM vs. CNO and saline wake vs. CNO. White and grey bars represent light and dark periods. ZT, zeitgeber time. **i-j**, Eight-day consecutive recordings of core temperature (**i**) and movement (**j**) after two single injections of CNO (dotted line) in a cohort of *Esr1Cre* female mice showing long torpor bouts ( $n = 4$  *Esr1Cre* females). Lines show group means, error bars or shaded area (**c**, **h-j**) show SEM, faded lines (**d**, **e**) show individual animals. \*\*\*\*,  $p < 0.0001$  for Sidak's multiple comparison tests comparing saline and CNO following a significant effect of treatment (**d** and **i**) in a two-way RM ANOVA or the interaction between treatment and time in a linear mixed effects model (**h**). \*\*,  $p < 0.01$  for unpaired, 2-tailed student's t-test (**f**).



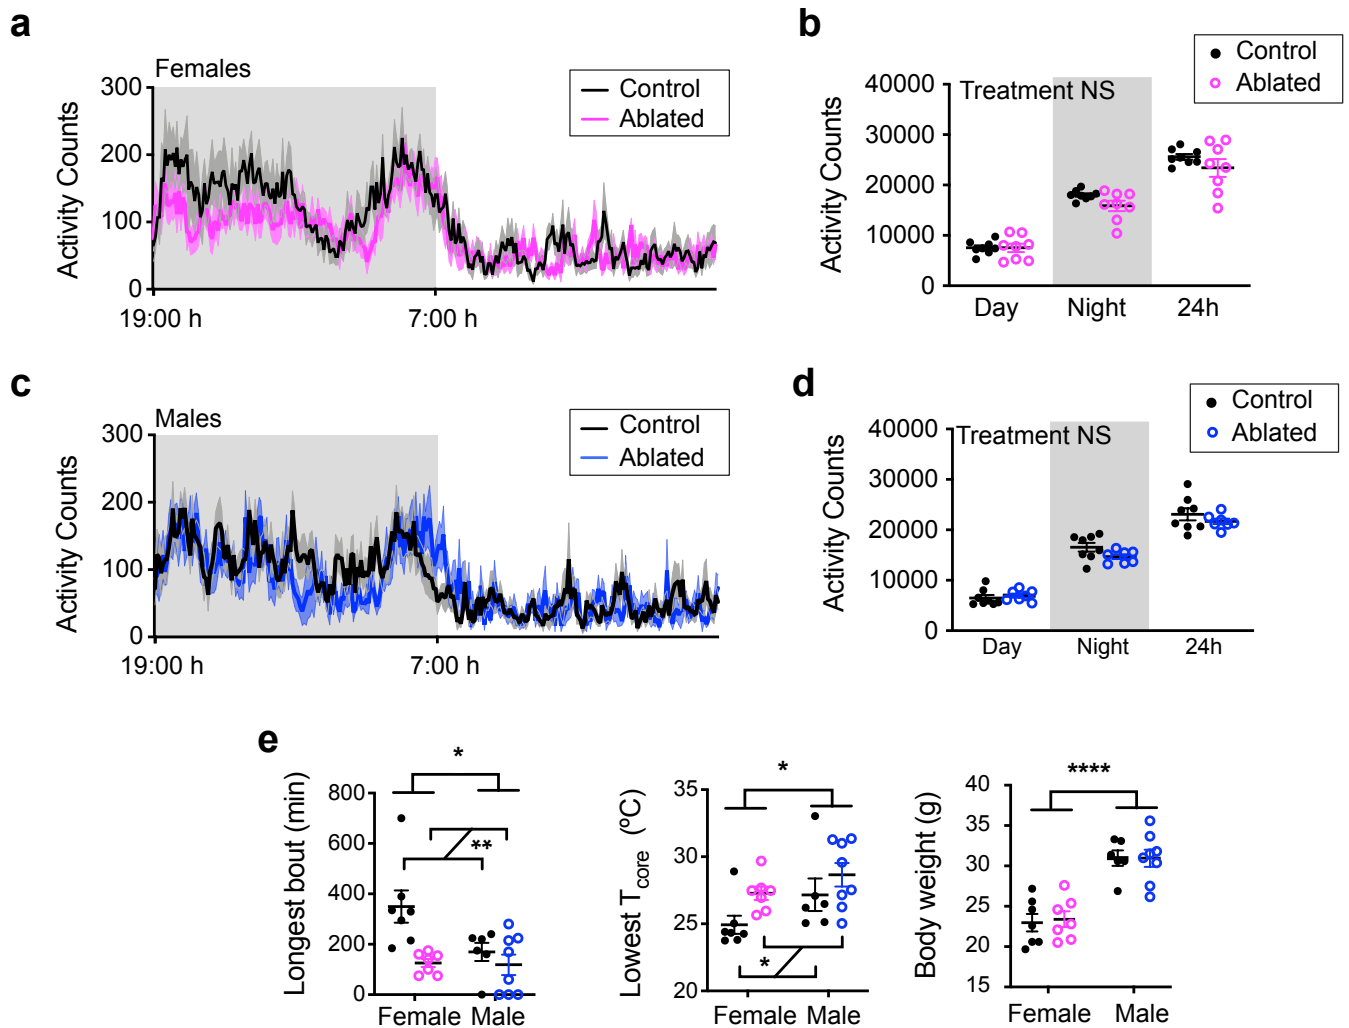

**Supplementary Figure 4. Sex differences after ablating ER $\alpha$ + MPA cells in baseline activity and fasting-induced torpor.** **a** and **c**, Physical activity over 24 h, measured every 5 min for 3 days. Group averages shown for control (black, n=8) and ablated (pink, n=8 female; blue, n=7 male) mice. Shading along the curve denotes the SEM. **b** and **d**, Sum of activity from mice shown in panel **a** and **c** highlighting per animal in light (7:00 to 19:00), dark (19:00 to 7:00), and total 24 h periods. **e**, Duration of the longest bout of  $T_{core} \leq 31^{\circ}C$ , lowest  $T_{core}$  and body weight during the fasting period for control females (n=7 mice), ablated females (n=7 mice), control males (n=6 mice), and ablated males (n=8 mice). Error bars show SEM. Statistical significance denoted by NS, not significant effect of treatment in a two-way RM ANOVA (**b** and **d**), \*,  $p < 0.05$  and \*\*,  $p < 0.01$ , \*\*\*\*,  $p < 0.0001$  for two-way ANOVA (**e**).

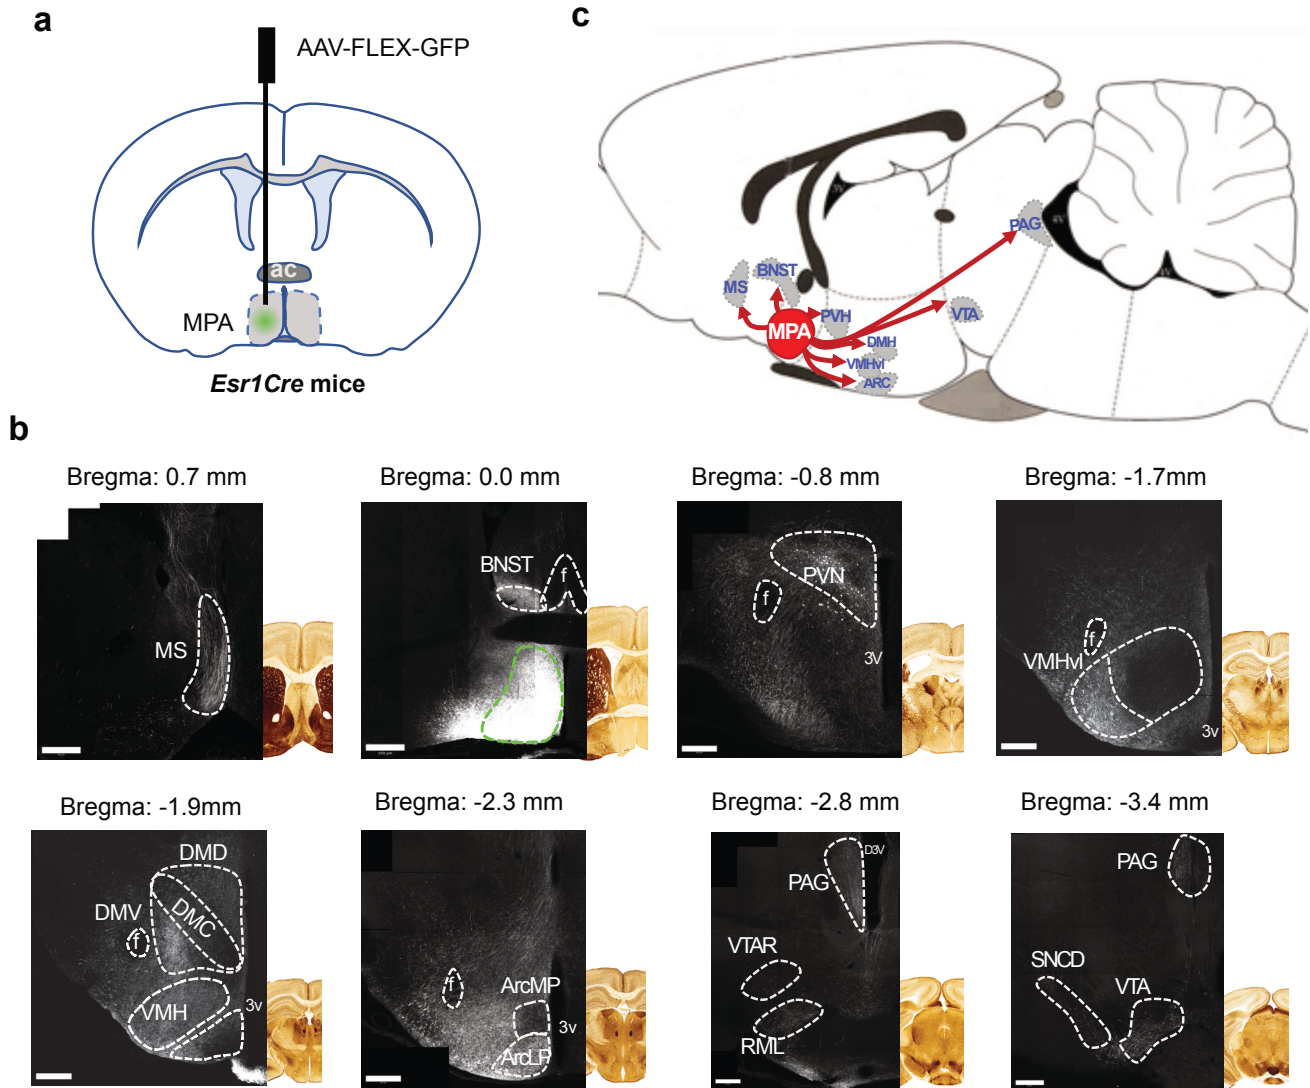

**Supplementary Figure 5. Projections of ER $\alpha$ + neurons from the MPA.** **a**, Schematic strategy for visualizing descending target structures from the MPA using Cre-dependent virus expressing GFP. **b**, GFP expression in ER $\alpha$ + cell bodies at the injection site (green dashed outline in Bregma: 0.0 mm) and in fibers from the major projection targets. Projection profile is shown 2 weeks after GFP injection. Images representative of  $n=3$  *Esr1Cre* female mice. 3v, third ventricle; ac, anterior commissure; ArcMP or ArcLP, arcuate nucleus, medial posterior part (ArcMP) or lateroposterior part (ArcLP); BNST, bed nucleus of stria terminalis; f, fornix; D3V, dorsal third ventricle; DMC (DMD/DMV), dorsal medial hypothalamus, compact part (or dorsal/ventral parts); MPA, medial preoptic area; MS, medial septum nucleus; PAG, periaqueductal gray; PVH, paraventricular hypothalamus; RML, retromammillary nucleus, lateral part; SNCD, substantia nigra, compact part, dorsal tier; VMH (vl), ventromedial hypothalamus (ventral lateral part); VTA (R), ventral tegmental area (rostral part). Scale bars, 250 $\mu$ m. **c**, Schematic summary of the major projection brain areas from ER $\alpha$ + MPA neurons.

**Supplementary Table 1.** qPCR primer sequences

| <b>Gene name</b>                                                      | <b>Symbol</b> | <b>Forward</b>        | <b>Reverse</b>        |
|-----------------------------------------------------------------------|---------------|-----------------------|-----------------------|
| Uncoupling protein 1                                                  | <i>Ucp1</i>   | CACGGGGACCTACAATGCTT  | TAGGGGTCGTCCCTTTCCAA  |
| Deiodinase, iodothyronine, type II                                    | <i>Dio2</i>   | CCTCAGAAGGGCTGCGCTGTG | TCAGCGGTCTTCTCCGAGGC  |
| PR domain containing 16                                               | <i>Prdm16</i> | GAAGTCACAGGAGGACACGG  | TCATTGCATATGCCTCCGGG  |
| Peroxisome proliferator-activated receptor gamma, coactivator 1 alpha | <i>Pgc1a</i>  | CAGTACAGCCCCGATGACTC  | GAAAGCTCGTCCACGTCAGAC |
| Adrenergic receptor, beta 3                                           | <i>Adrb3</i>  | GGAAGCTTGCTTGATCCCCA  | GCCGTTGCTTGTCTTTCTGG  |
